# Supplementary material for: Direct-to-consumer genetic testing for predicting sports performance and talent identification: Consensus statement
Source: HighWire-hosted journal article supplement (doi:10.1136/bjsports-2015-095343), 2015-11-18
Supplement: bjsports-2015-095343supp_table.pdf [file bjsports-2015-095343supp_table.pdf]

**Supplementary Table 1.** Companies found to be providing direct-to-consumer genetic tests marketed as relating to sport and exercise performance or risk of injury. Data may not be 100% accurate because accuracy is dependent on the ability to navigate the websites appropriately, and the contemporary accuracy of the information provided on the websites or client reports that have been shared with us. Gene names are in several instances listed verbatim as presented on the company websites/client reports, even though some gene names given might not conform to the standard nomenclature.

| <b>Company</b>             | <b>Website name</b>     | <b>Number of variants tested</b> | <b>Genes of variants tested (according to websites/client reports)</b>                                                                         |
|----------------------------|-------------------------|----------------------------------|------------------------------------------------------------------------------------------------------------------------------------------------|
| 23andMe                    | 23andme.com             | 1                                | <i>ACTN3</i>                                                                                                                                   |
| Advanced Business Services | abservices.eu           | Nf                               | Nf                                                                                                                                             |
| Agoga                      | agoga.com.au            | Nf                               | Nf                                                                                                                                             |
| Asper Biotech              | asperbio.com            | 2                                | <i>ACE, ACTN3</i>                                                                                                                              |
| Athletigen                 | athletigen.com          | 18                               | <i>ACTN3, ADRB2, AGT, AMPD1, CILP, COL1A1, COL5A1, CREB1, IL1B, HIF1A, MMP3, NAT2, PPARG, PPARGC1A, RAD23A</i>                                 |
| Atlas Sports Genetics      | atlasgene.com           | 1                                | <i>ACTN3</i>                                                                                                                                   |
| C2DNA                      | c2dna.com               | Nf                               | Nf                                                                                                                                             |
| Cosmetics DNA              | cosmetics-dna.com       | Nf                               | Nf                                                                                                                                             |
| CyGene Direct              | cygene.infinityarts.com | 6                                | <i>ACE, APOE, BDKRB2, ENOS, VDR</i>                                                                                                            |
| DNA Fit                    | dnafit.com              | 21                               | <i>ACE, ACTN3, ADRB2, AGT, BDKRB2, COL1A1, COL5A1, CRP, GDF5, GSTM1, GSTT1, IL6, IL-6R, NRF-2, PPARA, PPARGC1A, SOD2, TNF, TRHR, VDR, VEGF</i> |
| DNA Spectrum               | dnaspectrum.com         | 7                                | <i>ACE, ACTN3, ADRB2, ADR3B, ENOS, FTO</i>                                                                                                     |

|                                 |                        |    |                                                                                                                                                            |
|---------------------------------|------------------------|----|------------------------------------------------------------------------------------------------------------------------------------------------------------|
| DNAeX                           | dnaex.net              | 14 | <i>ACE, ACTN3, ADRB2, AGT, BDKRB2, COL5A1, CRP, IL6, NRF, PPARA, PPARGC1A, TRHR, VDR, VEGF</i>                                                             |
| DNAlysis                        | danalysis.co.za        | 19 | <i>ACE, ACTN3, ADRB2, AGT, BDRKB, COL1A1, COL5A1, CRP, GDF5, IL6, IL-6R, NRF-2, PPARA, PPARGC1A, SOD2, TNF, TRHR, VDR, VEGF</i>                            |
| GenePlanet                      | geneplanet.com         | 2  | <i>ACTN3, PPARA</i>                                                                                                                                        |
| Genetic Center                  | genetic-center.com     | Nf | Nf                                                                                                                                                         |
| Genetic Performance             | geneticperformance.com | Nf | Nf                                                                                                                                                         |
| Genetrainer                     | genetrainer.com        | Nf | Nf                                                                                                                                                         |
| Gknowmix                        | gknowmix.com           | Nf | Nf                                                                                                                                                         |
| Gonidio                         | gonidio.com            | 27 | <i>ACE, ACTN3, ADRA2A, ADRB1, ADRB2, AMPD1, BDKRB2, CHRM2, CK-MM, COL1A1, COL5A1, DIO1, EPOR, HBB, HIF-1, MCT-1, MMP3, NOS3, PPARD, PPARGC1, VDR, VEGF</i> |
| IgnitePlay                      | igniteplay.com         | Nf | Nf                                                                                                                                                         |
| Institute for Optimum Nutrition | ion.ac.uk              | Nf | Nf                                                                                                                                                         |
| Lyfgene DNA                     | lyfgene.com            | Nf | Nf                                                                                                                                                         |
| Molecular Testing Labs Fitness  | mtlfitness.com         | 9  | <i>ACTN3, EDN1, INSIG2, LIPC, LPL, MMP3, PPARD, PPARGC1A, SLC30A9</i>                                                                                      |
| Musclegenes                     | musclegenes.com        | Nf | Nf                                                                                                                                                         |
| MyInnerGo                       | myinnergo.com          | Nf | Nf                                                                                                                                                         |
| MyRISQ                          | myrisq.com             | Nf | Nf                                                                                                                                                         |
| Nordic Laboratories             | nordiclabs.com         | 20 | <i>ACE, ACTN3, ADRB2, AGT, BDRKB, COL1A1, COL5A1, CRP, GDF5, IL6,</i>                                                                                      |

|                     |                        |    |                                                                                                                                     |
|---------------------|------------------------|----|-------------------------------------------------------------------------------------------------------------------------------------|
|                     |                        |    | <i>IL6R, NRF, PPARA, PPARGC1A, SOD2, TNF, TRHR, VDR, VEGF</i>                                                                       |
| Nutragene           | nutragene.com          | Nf | Nf                                                                                                                                  |
| Pathway Genomics    | pathway.com            | Nf | Nf                                                                                                                                  |
| Phenom Biosciences  | iamaphenom.com         | Nf | Nf                                                                                                                                  |
| PlayDNA             | playdna.co.uk          | Nf | Nf                                                                                                                                  |
| Simplified Genetics | simplifiedgenetics.com | 5  | <i>ADRB2, ADRB3, APOE, PPARG</i>                                                                                                    |
| Sports Gene         | sportsgene.ee          | 6  | <i>ACE, ACTN3, AMPD1, GDF8, NOS3, PPARGC1A</i>                                                                                      |
| The Wellness Gene   | wellnessgene.com       | 23 | <i>ACE, ACTN3, AMPD1, BDKRB2, CHRM2, CKMM, COL1A1, COL5A1, DIO1, EPOR, HBB, HIF1A, MCT1, MMP3, NOS3, PPARG, PPARGC1A, VDR, VEGF</i> |
| TheMakingsofMe      | themakingsofme.com     | 3  | <i>ACTN3, HIF1A, NOS3</i>                                                                                                           |
| ThinnerGene         | thinnergene.com        | Nf | Nf                                                                                                                                  |
| ThriveLondon        | thrivelondon.com       | Nf | Nf                                                                                                                                  |
| Woblab              | woblab.com             | 6  | <i>ACE, ACTN3, AMPD1, GDF8, NOS3, PPARGC1A</i>                                                                                      |
| XRGenomics          | xrgenomics.com         | Nf | Nf                                                                                                                                  |

Nf = Information not found
